# Supplementary material for: Mendelian randomization study on the causal relationship between leukocyte telomere length and prostate cancer
Source: PubMed Central journal article supplement (PMC10289467; doi:10.1371/journal.pone.0286219), 2023-06-23

A

Cohort 1

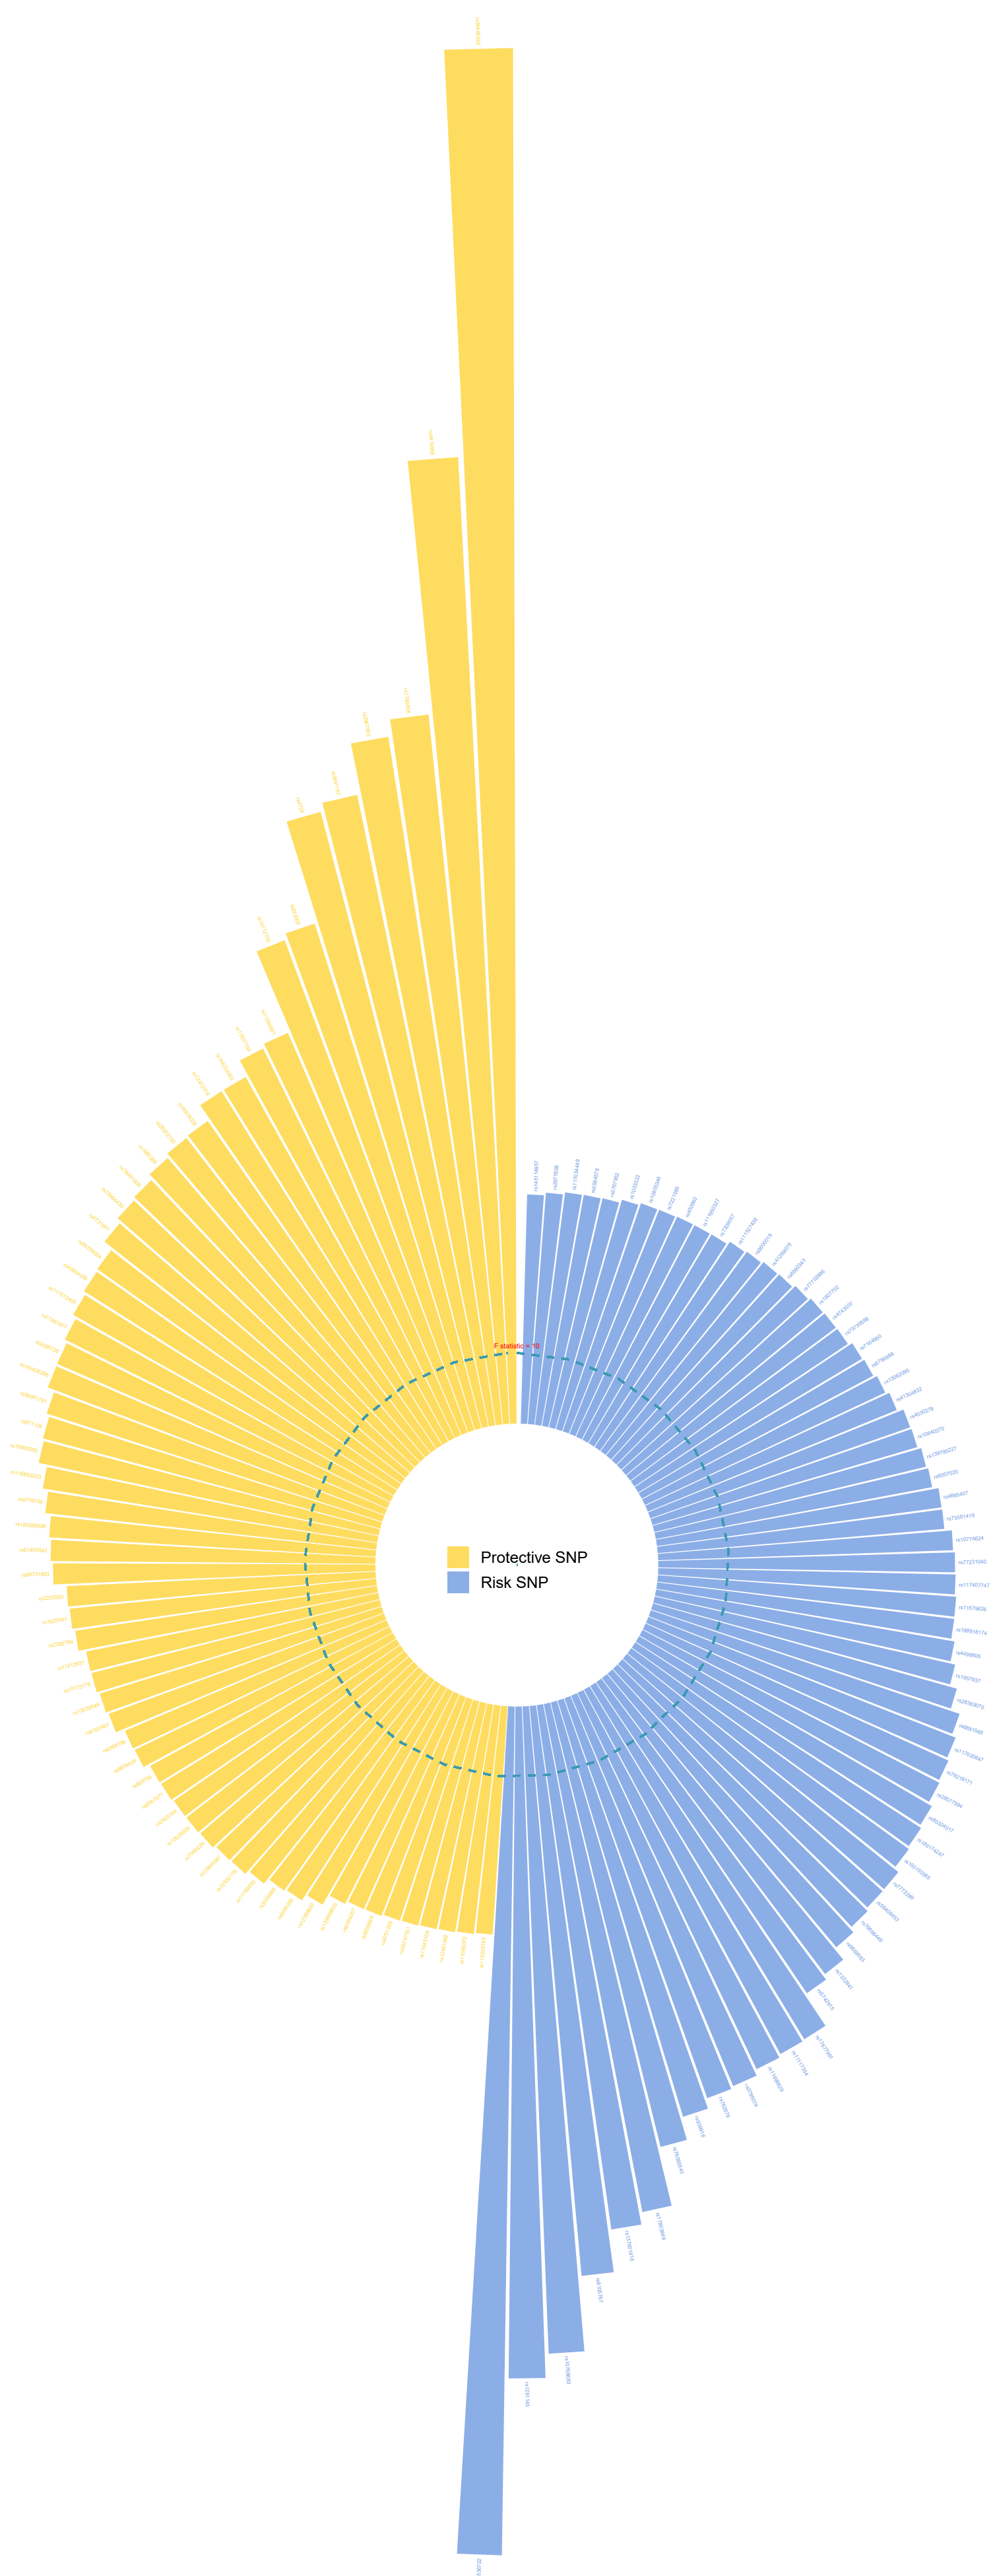

B

Cohort 2

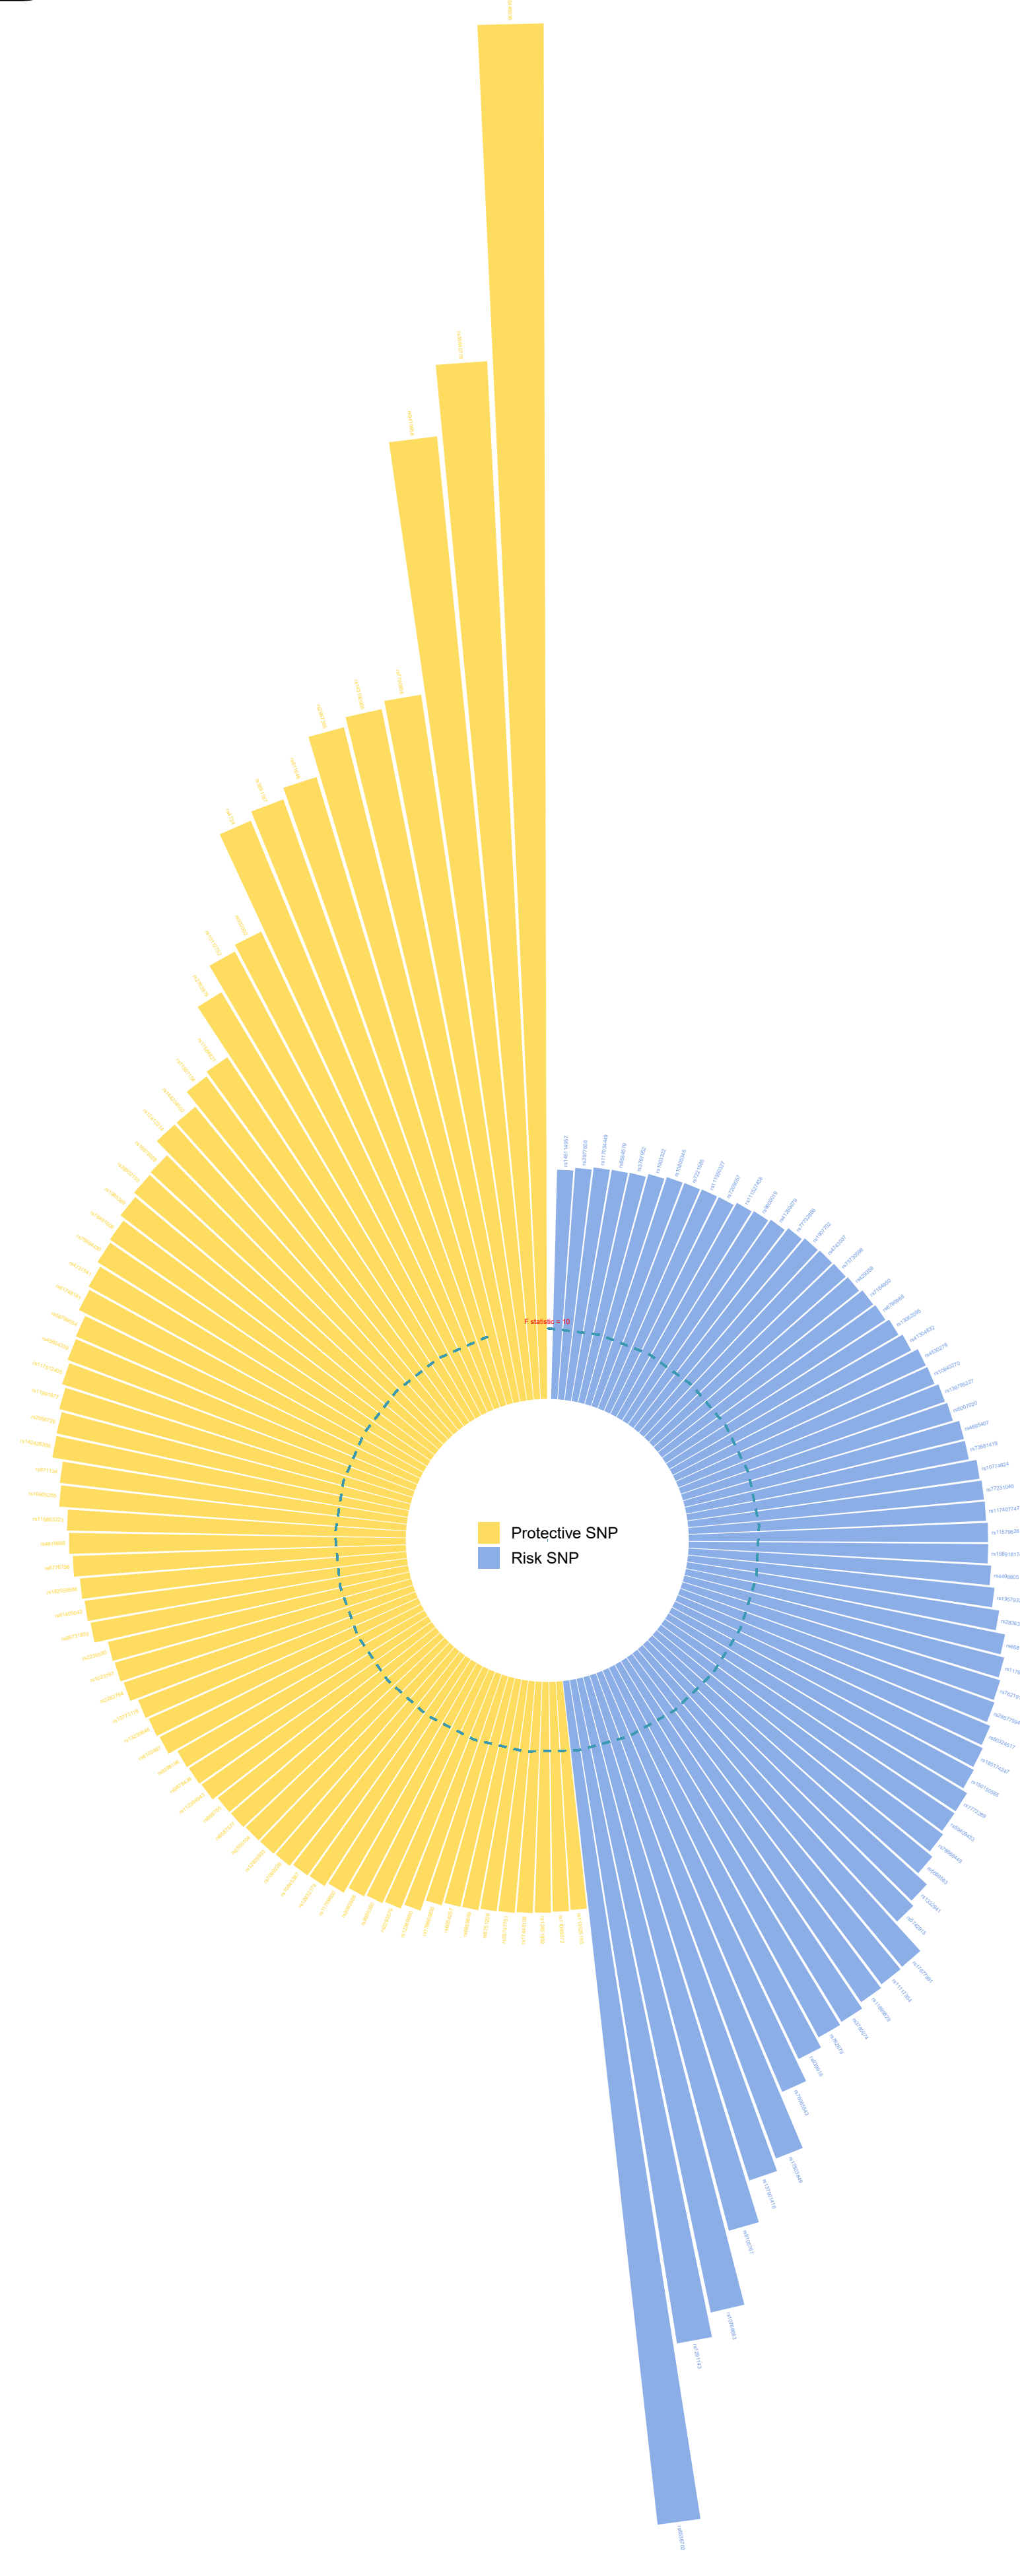

C

Cohort 3

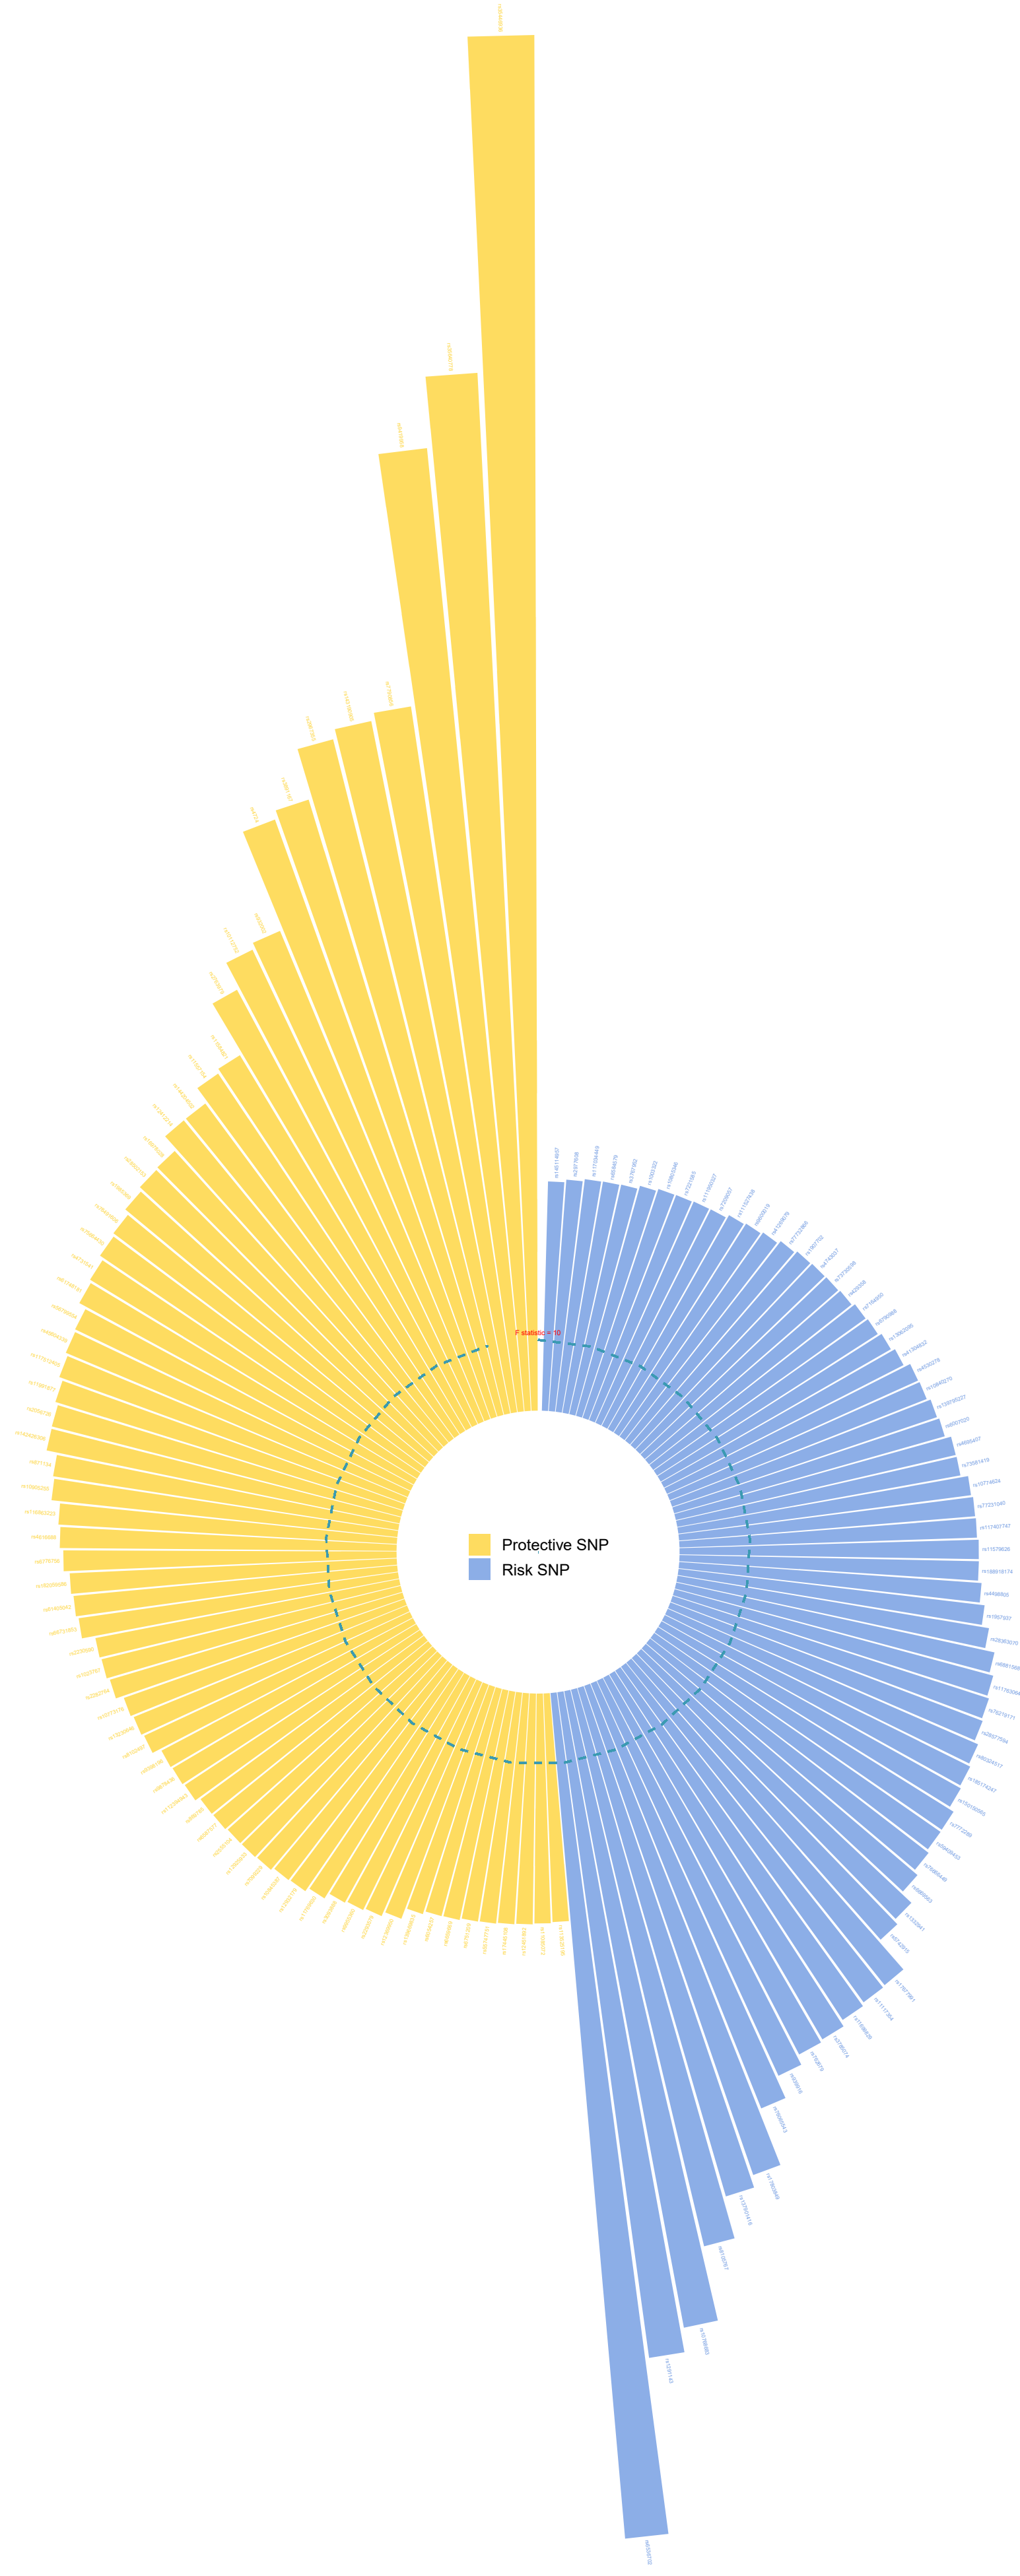

D

Cohort 4

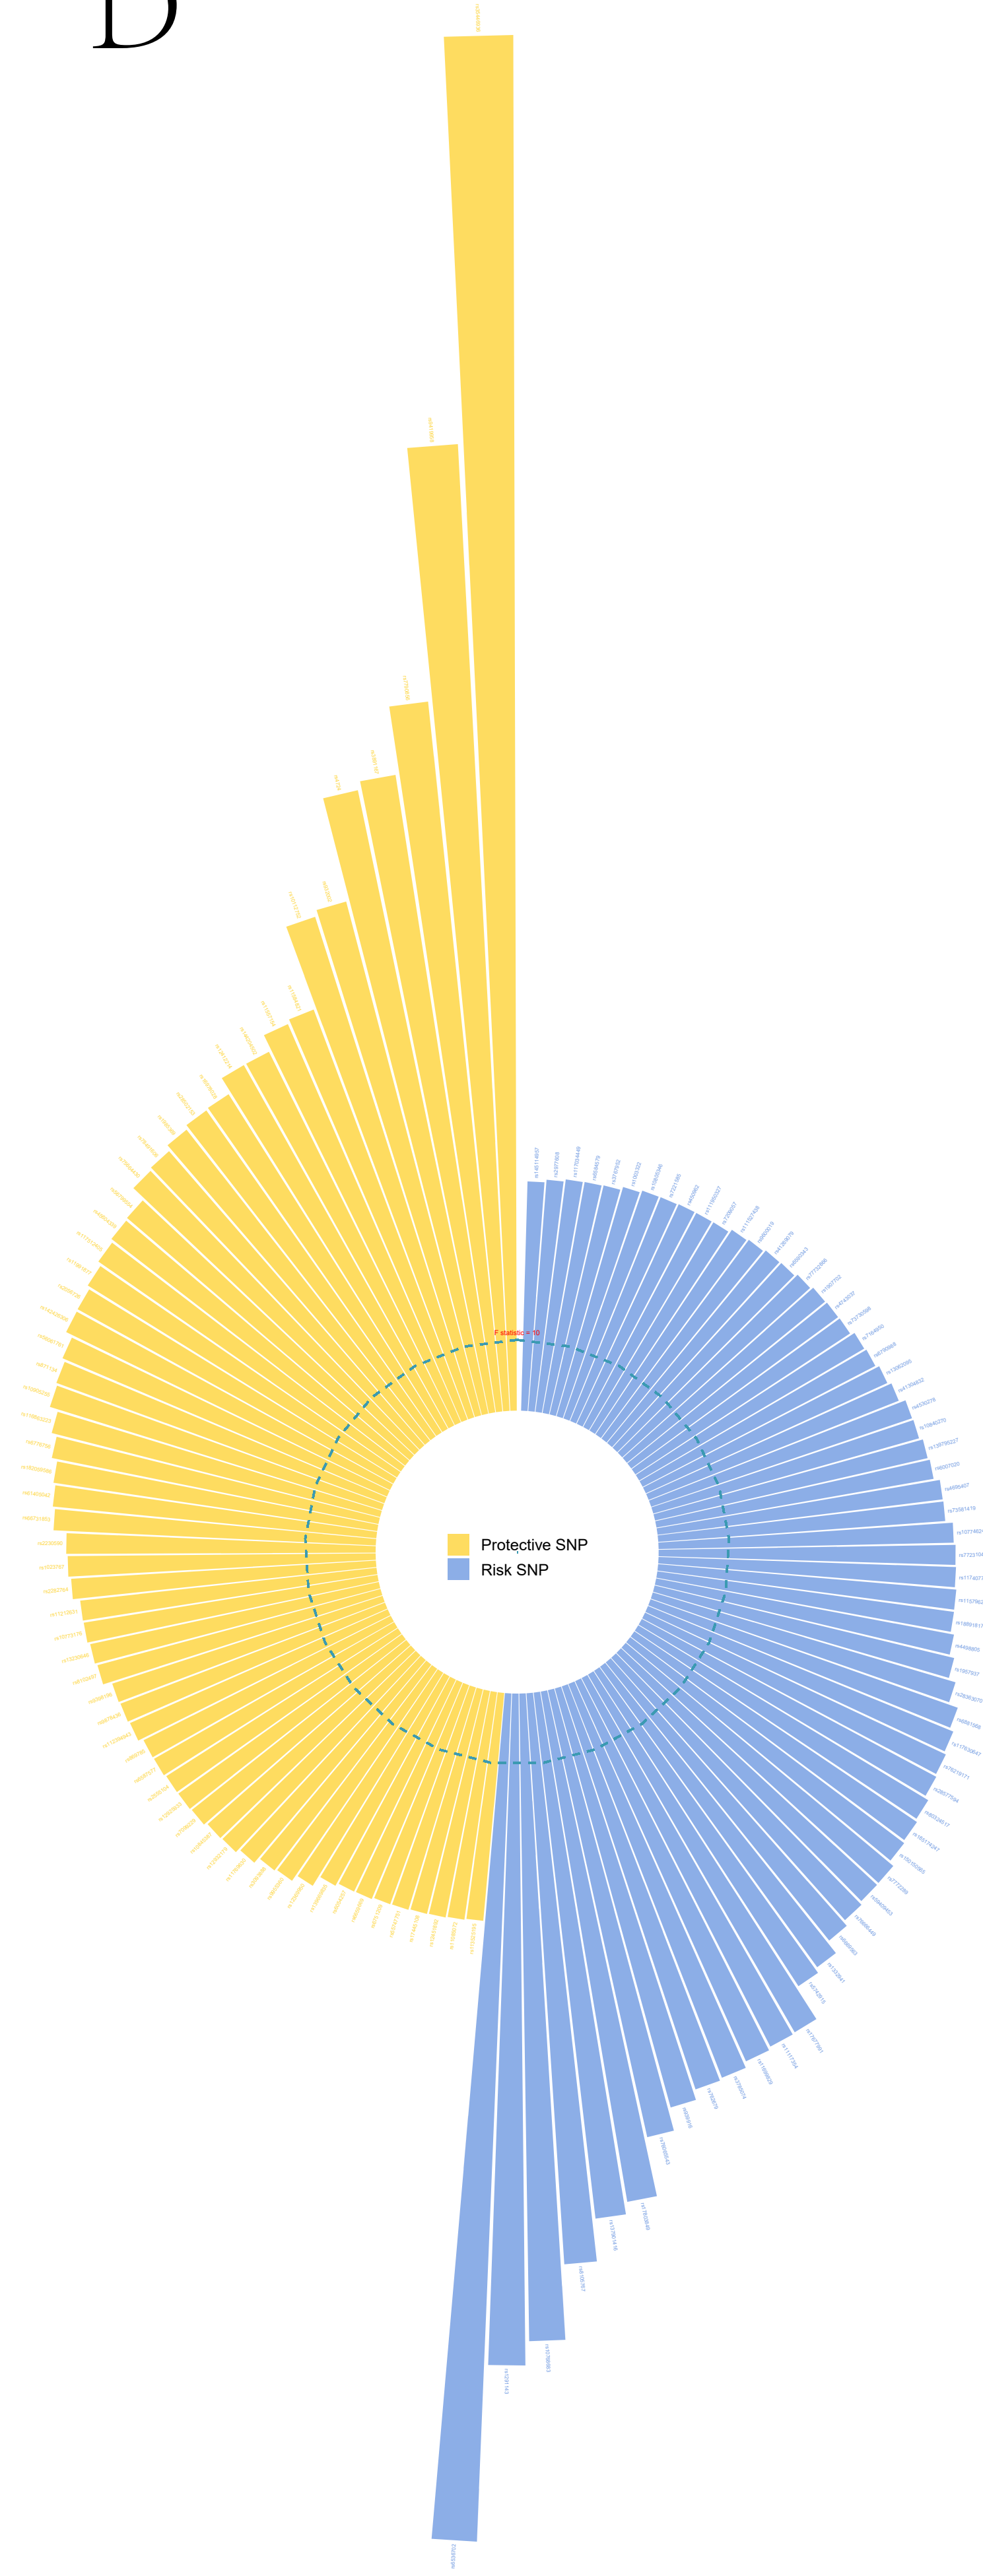

Supplement: pone.0286219.s001.pdf [file pone.0286219.s001.pdf]
