# Supplementary material for: Mendelian randomization study on the causal relationship between leukocyte telomere length and prostate cancer
Source: PubMed Central journal article supplement (PMC10289467; doi:10.1371/journal.pone.0286219), 2023-06-23
Supplement: pone.0286219.s003.pdf [file pone.0286219.s003.pdf]

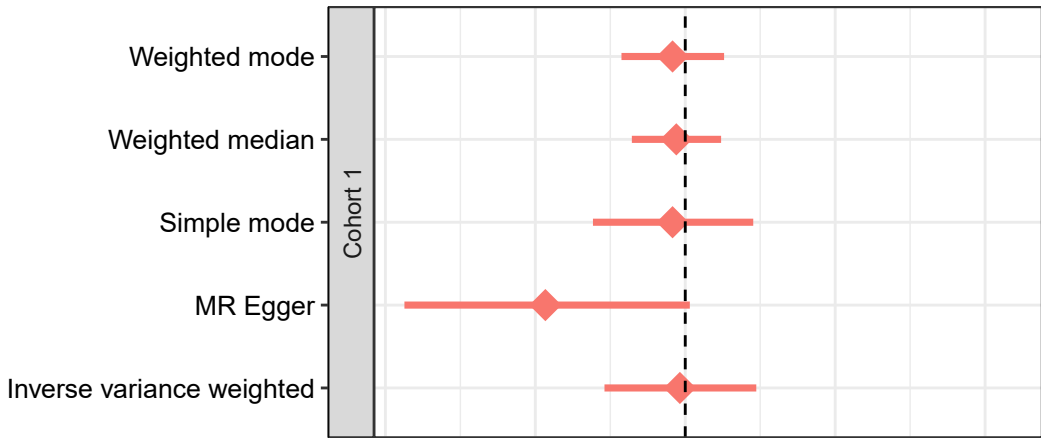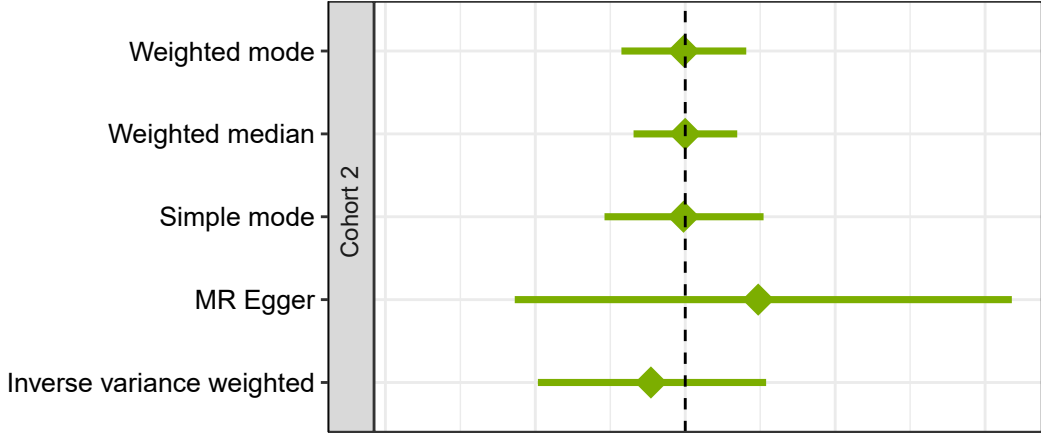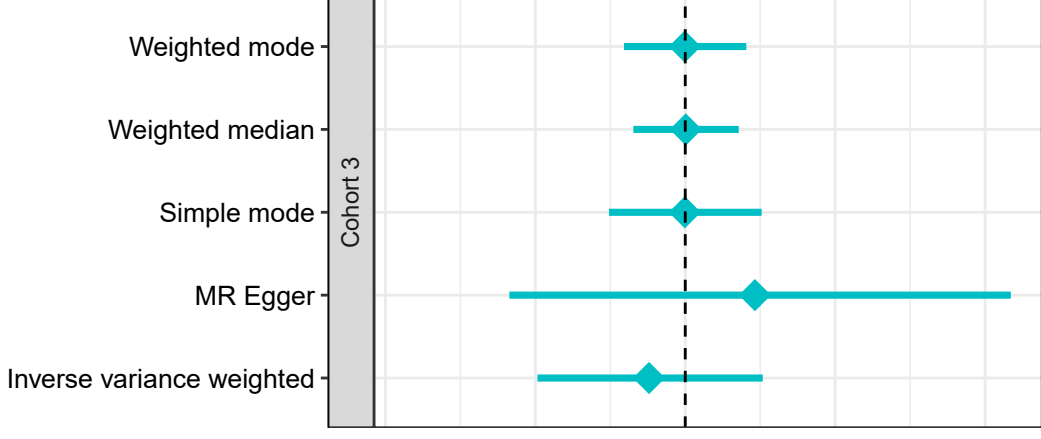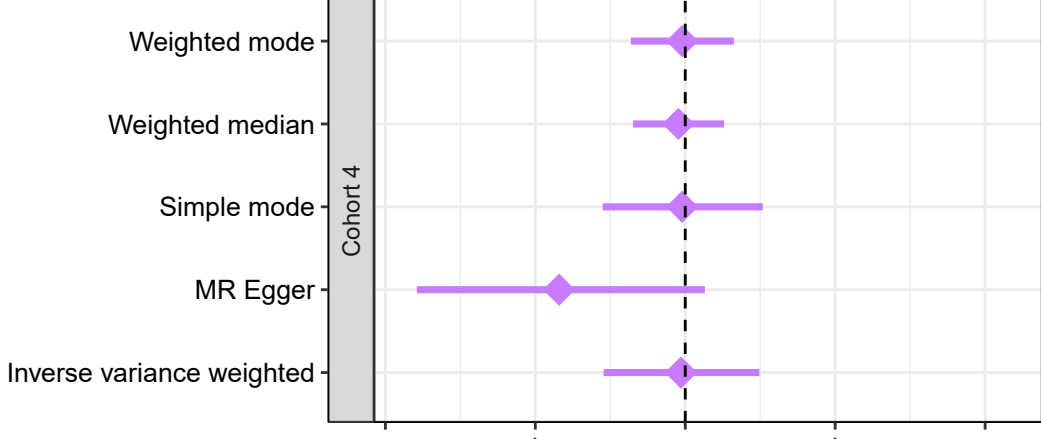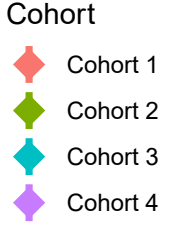

OR (95%CI)
